# Supplementary material for: Vulvar lichen sclerosus in pregnancy: Unaddressed needs and systematic review
Source: PubMed Central journal article supplement (PMC10549801; doi:10.1002/ski2.281), 2023-09-04
Supplement: SKI2-3-e281-s001.pdf [file SKI2-3-e281-s001.pdf]

**PRISMA 2020 flow diagram for new systematic reviews which included searches of databases, registers and other sources**

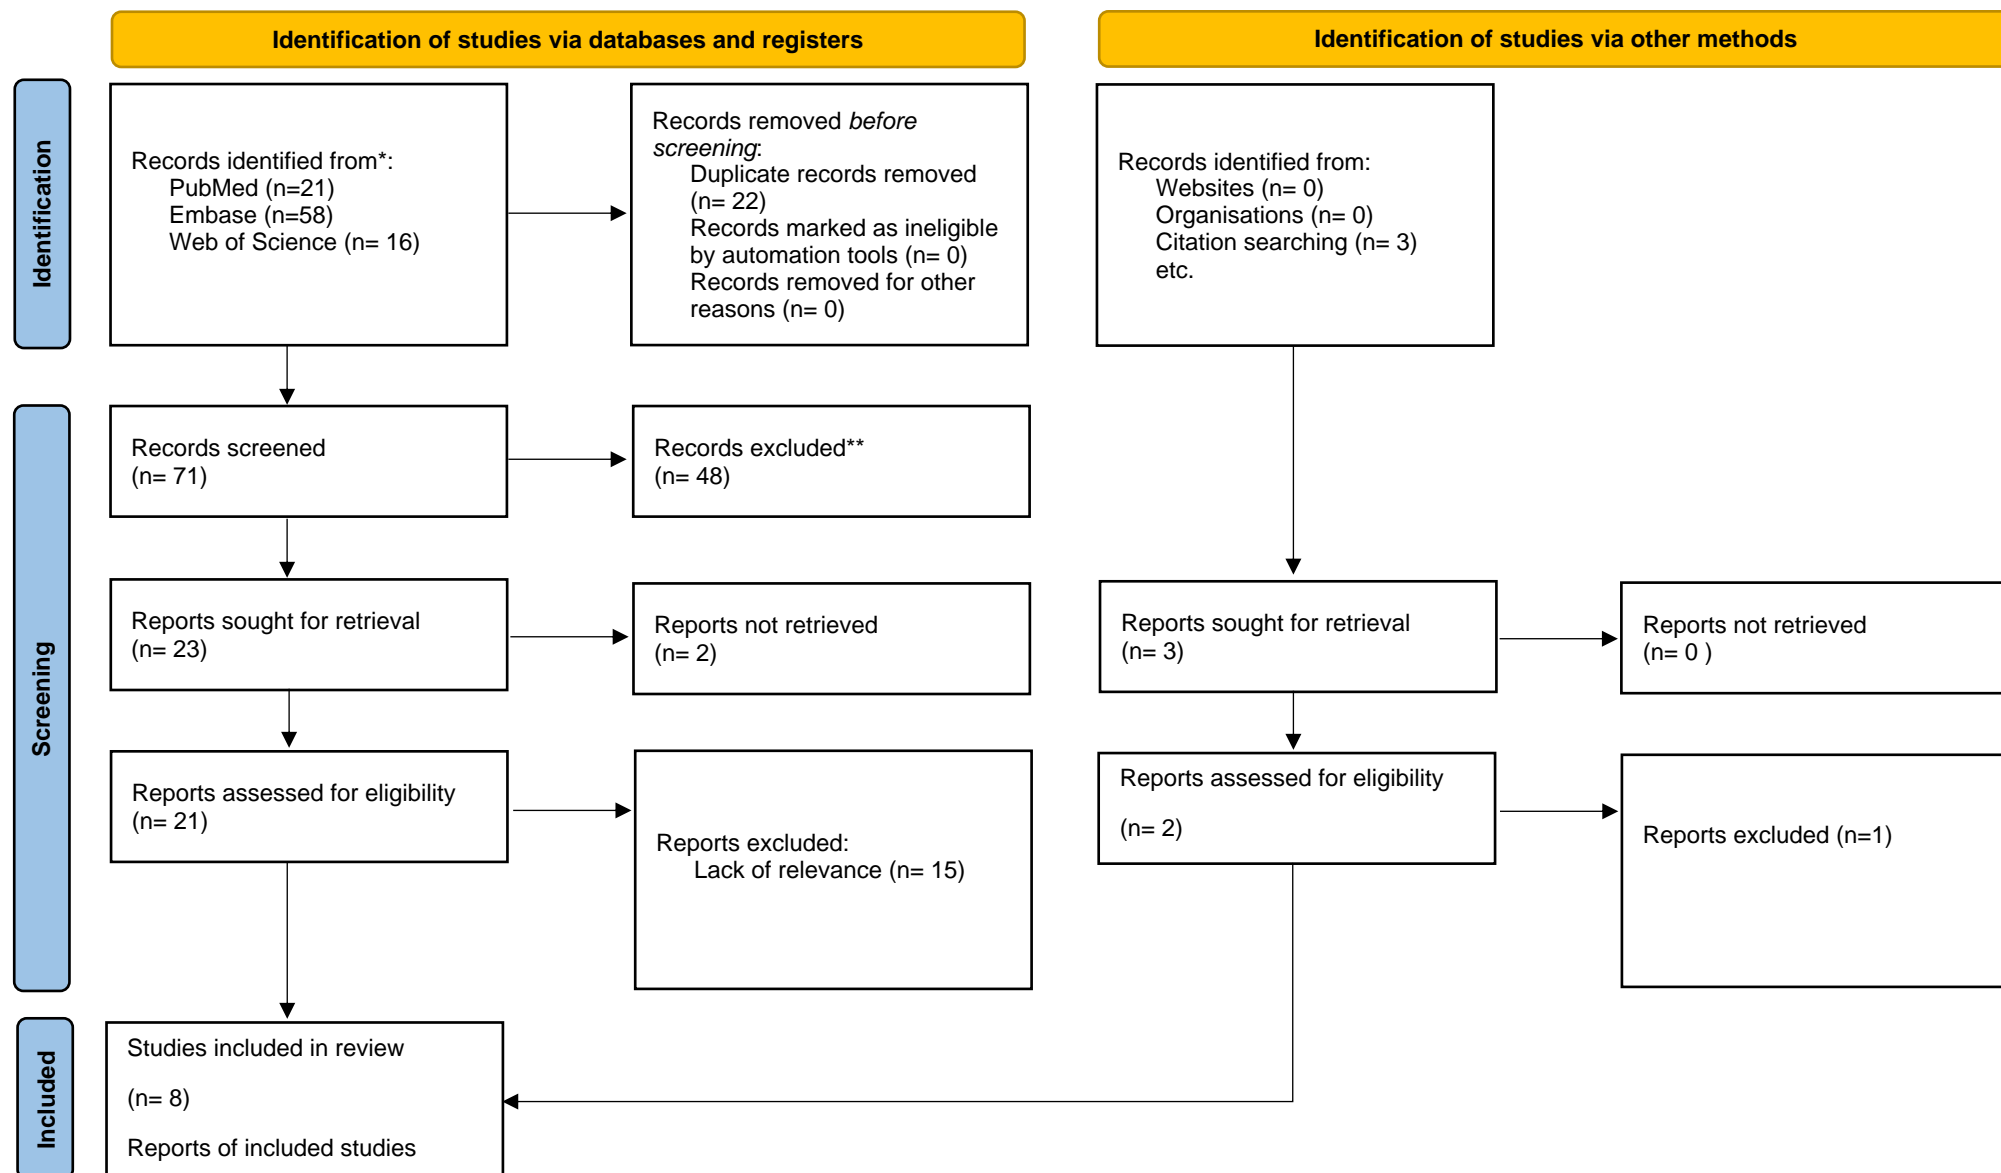

\*Consider, if feasible to do so, reporting the number of records identified from each database or register searched (rather than the total number across all databases/registers).

\*\*If automation tools were used, indicate how many records were excluded by a human and how many were excluded by automation tools.

From: Page MJ, McKenzie JE, Bossuyt PM, Boutron I, Hoffmann TC, Mulrow CD, et al. The PRISMA 2020 statement: an updated guideline for reporting systematic reviews. *BMJ* 2021;372:n71. doi: 10.1136/bmj.n71. For more information, visit: <http://www.prisma-statement.org/>
