# Supplementary material for: Vulvar lichen sclerosus in pregnancy: Unaddressed needs and systematic review
Source: PubMed Central journal article supplement (PMC10549801; doi:10.1002/ski2.281), 2023-09-04
Supplement: SKI2-3-e281-s002.pdf [file SKI2-3-e281-s002.pdf]

# JBI Critical Appraisal Checklist for Case Series

Reviewer: Britt Debaene, Sander Vandeweege and Hans Verstraelen

Date: 16/04/2023

Author: Elysha Kolitz

Year: 2021

Record Number \_\_\_\_\_

|                                                                                                                 | Yes                                 | No                       | Unclear                             | Not applicable                      |
|-----------------------------------------------------------------------------------------------------------------|-------------------------------------|--------------------------|-------------------------------------|-------------------------------------|
| • Were there clear criteria for inclusion in the case series?                                                   | <input checked="" type="checkbox"/> | <input type="checkbox"/> | <input type="checkbox"/>            | <input type="checkbox"/>            |
| • Was the condition measured in a standard, reliable way for all participants included in the case series?      | <input type="checkbox"/>            | <input type="checkbox"/> | <input checked="" type="checkbox"/> | <input type="checkbox"/>            |
| • Were valid methods used for identification of the condition for all participants included in the case series? | <input type="checkbox"/>            | <input type="checkbox"/> | <input checked="" type="checkbox"/> | <input type="checkbox"/>            |
| • Did the case series have consecutive inclusion of participants?                                               | <input type="checkbox"/>            | <input type="checkbox"/> | <input checked="" type="checkbox"/> | <input type="checkbox"/>            |
| • Did the case series have complete inclusion of participants?                                                  | <input type="checkbox"/>            | <input type="checkbox"/> | <input checked="" type="checkbox"/> | <input type="checkbox"/>            |
| • Was there clear reporting of the demographics of the participants in the study?                               | <input checked="" type="checkbox"/> | <input type="checkbox"/> | <input type="checkbox"/>            | <input type="checkbox"/>            |
| • Was there clear reporting of clinical information of the participants?                                        | <input checked="" type="checkbox"/> | <input type="checkbox"/> | <input type="checkbox"/>            | <input type="checkbox"/>            |
| • Were the outcomes or follow up results of cases clearly reported?                                             | <input checked="" type="checkbox"/> | <input type="checkbox"/> | <input type="checkbox"/>            | <input type="checkbox"/>            |
| • Was there clear reporting of the presenting site(s)/clinic(s) demographic information?                        | <input checked="" type="checkbox"/> | <input type="checkbox"/> | <input type="checkbox"/>            | <input type="checkbox"/>            |
| • Was statistical analysis appropriate?                                                                         | <input type="checkbox"/>            | <input type="checkbox"/> | <input type="checkbox"/>            | <input checked="" type="checkbox"/> |

Overall appraisal:    Include     Exclude     Seek further info

Comments (Including reason for exclusion)

---

---

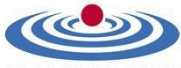

# JBI Critical Appraisal Checklist for Case Series

Reviewer: Britt Debaene, Sander Vandeweege and Hans Verstraelen

Date 16/04/2023

Author: Klaus F. Helm

Year 1991

Record Number \_\_\_\_\_

|                                                                                                                  | Yes                                 | No                                  | Unclear                             | Not applicable                      |
|------------------------------------------------------------------------------------------------------------------|-------------------------------------|-------------------------------------|-------------------------------------|-------------------------------------|
| 1. Were there clear criteria for inclusion in the case series?                                                   | <input checked="" type="checkbox"/> | <input type="checkbox"/>            | <input type="checkbox"/>            | <input type="checkbox"/>            |
| 2. Was the condition measured in a standard, reliable way for all participants included in the case series?      | <input type="checkbox"/>            | <input type="checkbox"/>            | <input checked="" type="checkbox"/> | <input type="checkbox"/>            |
| 3. Were valid methods used for identification of the condition for all participants included in the case series? | <input checked="" type="checkbox"/> | <input type="checkbox"/>            | <input type="checkbox"/>            | <input type="checkbox"/>            |
| 4. Did the case series have consecutive inclusion of participants?                                               | <input type="checkbox"/>            | <input checked="" type="checkbox"/> | <input type="checkbox"/>            | <input type="checkbox"/>            |
| 5. Did the case series have complete inclusion of participants?                                                  | <input checked="" type="checkbox"/> | <input type="checkbox"/>            | <input type="checkbox"/>            | <input type="checkbox"/>            |
| 6. Was there clear reporting of the demographics of the participants in the study?                               | <input checked="" type="checkbox"/> | <input type="checkbox"/>            | <input type="checkbox"/>            | <input type="checkbox"/>            |
| 7. Was there clear reporting of clinical information of the participants?                                        | <input checked="" type="checkbox"/> | <input type="checkbox"/>            | <input type="checkbox"/>            | <input type="checkbox"/>            |
| 8. Were the outcomes or follow up results of cases clearly reported?                                             | <input checked="" type="checkbox"/> | <input type="checkbox"/>            | <input type="checkbox"/>            | <input type="checkbox"/>            |
| 9. Was there clear reporting of the presenting site(s)/clinic(s) demographic information?                        | <input type="checkbox"/>            | <input checked="" type="checkbox"/> | <input type="checkbox"/>            | <input type="checkbox"/>            |
| 10. Was statistical analysis appropriate?                                                                        | <input type="checkbox"/>            | <input type="checkbox"/>            | <input type="checkbox"/>            | <input checked="" type="checkbox"/> |

Overall appraisal: Include  Exclude  Seek further info

Comments (Including reason for exclusion)

---



---



---

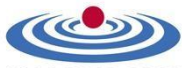

### JBI Critical Appraisal Checklist for Case Series

Reviewer: Britt Debaene, Sander Vandeweege and Hans Verstraelen

Date 16/04/2023

Author: Yvonne Nguyen

Year 2018

Record Number \_\_\_\_\_

|                                                                                                                  | Yes                                 | No                                  | Unclear                             | Not applicable                      |
|------------------------------------------------------------------------------------------------------------------|-------------------------------------|-------------------------------------|-------------------------------------|-------------------------------------|
| 1. Were there clear criteria for inclusion in the case series?                                                   | <input checked="" type="checkbox"/> | <input type="checkbox"/>            | <input type="checkbox"/>            | <input type="checkbox"/>            |
| 2. Was the condition measured in a standard, reliable way for all participants included in the case series?      | <input type="checkbox"/>            | <input type="checkbox"/>            | <input checked="" type="checkbox"/> | <input type="checkbox"/>            |
| 3. Were valid methods used for identification of the condition for all participants included in the case series? | <input checked="" type="checkbox"/> | <input type="checkbox"/>            | <input type="checkbox"/>            | <input type="checkbox"/>            |
| 4. Did the case series have consecutive inclusion of participants?                                               | <input checked="" type="checkbox"/> | <input type="checkbox"/>            | <input type="checkbox"/>            | <input type="checkbox"/>            |
| 5. Did the case series have complete inclusion of participants?                                                  | <input checked="" type="checkbox"/> | <input type="checkbox"/>            | <input type="checkbox"/>            | <input type="checkbox"/>            |
| 6. Was there clear reporting of the demographics of the participants in the study?                               | <input type="checkbox"/>            | <input checked="" type="checkbox"/> | <input type="checkbox"/>            | <input type="checkbox"/>            |
| 7. Was there clear reporting of clinical information of the participants?                                        | <input checked="" type="checkbox"/> | <input type="checkbox"/>            | <input type="checkbox"/>            | <input type="checkbox"/>            |
| 8. Were the outcomes or follow up results of cases clearly reported?                                             | <input checked="" type="checkbox"/> | <input type="checkbox"/>            | <input type="checkbox"/>            | <input type="checkbox"/>            |
| 9. Was there clear reporting of the presenting site(s)/clinic(s) demographic information?                        | <input type="checkbox"/>            | <input checked="" type="checkbox"/> | <input type="checkbox"/>            | <input type="checkbox"/>            |
| 10. Was statistical analysis appropriate?                                                                        | <input type="checkbox"/>            | <input type="checkbox"/>            | <input type="checkbox"/>            | <input checked="" type="checkbox"/> |

Overall appraisal: Include  Exclude  Seek further info

Comments (Including reason for exclusion)

---



---



---

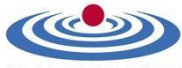

### JBI Critical Appraisal Checklist for Case Series

Reviewer: Britt Debaene, Sander Vandeweege and Hans Verstraelen

Date 16/04/2023

Author: HopeK. Haefner

Year 1999

Record Number \_\_\_\_\_

|                                                                                                                  | Yes                                 | No                                  | Unclear                             | Not applicable                      |
|------------------------------------------------------------------------------------------------------------------|-------------------------------------|-------------------------------------|-------------------------------------|-------------------------------------|
| 1. Were there clear criteria for inclusion in the case series?                                                   | <input type="checkbox"/>            | <input checked="" type="checkbox"/> | <input type="checkbox"/>            | <input type="checkbox"/>            |
| 2. Was the condition measured in a standard, reliable way for all participants included in the case series?      | <input type="checkbox"/>            | <input checked="" type="checkbox"/> | <input type="checkbox"/>            | <input type="checkbox"/>            |
| 3. Were valid methods used for identification of the condition for all participants included in the case series? | <input checked="" type="checkbox"/> | <input type="checkbox"/>            | <input type="checkbox"/>            | <input type="checkbox"/>            |
| 4. Did the case series have consecutive inclusion of participants?                                               | <input type="checkbox"/>            | <input type="checkbox"/>            | <input checked="" type="checkbox"/> | <input type="checkbox"/>            |
| 5. Did the case series have complete inclusion of participants?                                                  | <input type="checkbox"/>            | <input type="checkbox"/>            | <input checked="" type="checkbox"/> | <input type="checkbox"/>            |
| 6. Was there clear reporting of the demographics of the participants in the study?                               | <input type="checkbox"/>            | <input checked="" type="checkbox"/> | <input type="checkbox"/>            | <input type="checkbox"/>            |
| 7. Was there clear reporting of clinical information of the participants?                                        | <input checked="" type="checkbox"/> | <input type="checkbox"/>            | <input type="checkbox"/>            | <input type="checkbox"/>            |
| 8. Were the outcomes or follow up results of cases clearly reported?                                             | <input checked="" type="checkbox"/> | <input type="checkbox"/>            | <input type="checkbox"/>            | <input type="checkbox"/>            |
| 9. Was there clear reporting of the presenting site(s)/clinic(s) demographic information?                        | <input type="checkbox"/>            | <input checked="" type="checkbox"/> | <input type="checkbox"/>            | <input type="checkbox"/>            |
| 10. Was statistical analysis appropriate?                                                                        | <input type="checkbox"/>            | <input type="checkbox"/>            | <input type="checkbox"/>            | <input checked="" type="checkbox"/> |

Overall appraisal: Include  Exclude  Seek further info

Comments (Including reason for exclusion)

---



---



---

## JBI Critical Appraisal Checklist for Case Series

Reviewer: Britt Debaene, Sander Vandeweege and Hans Verstraelen

Date: 16/04/2023

Author: Katharine L. Dalziel

Year: 1995

Record Number \_\_\_\_\_

|                                                                                                                 | Yes                                 | No                                  | Unclear                             | Not applicable                      |
|-----------------------------------------------------------------------------------------------------------------|-------------------------------------|-------------------------------------|-------------------------------------|-------------------------------------|
| • Were there clear criteria for inclusion in the case series?                                                   | <input type="checkbox"/>            | <input checked="" type="checkbox"/> | <input type="checkbox"/>            | <input type="checkbox"/>            |
| • Was the condition measured in a standard, reliable way for all participants included in the case series?      | <input type="checkbox"/>            | <input type="checkbox"/>            | <input checked="" type="checkbox"/> | <input type="checkbox"/>            |
| • Were valid methods used for identification of the condition for all participants included in the case series? | <input checked="" type="checkbox"/> | <input type="checkbox"/>            | <input type="checkbox"/>            | <input type="checkbox"/>            |
| • Did the case series have consecutive inclusion of participants?                                               | <input type="checkbox"/>            | <input type="checkbox"/>            | <input checked="" type="checkbox"/> | <input type="checkbox"/>            |
| • Did the case series have complete inclusion of participants?                                                  | <input type="checkbox"/>            | <input type="checkbox"/>            | <input checked="" type="checkbox"/> | <input type="checkbox"/>            |
| • Was there clear reporting of the demographics of the participants in the study?                               | <input checked="" type="checkbox"/> | <input type="checkbox"/>            | <input type="checkbox"/>            | <input type="checkbox"/>            |
| • Was there clear reporting of clinical information of the participants?                                        | <input type="checkbox"/>            | <input checked="" type="checkbox"/> | <input type="checkbox"/>            | <input type="checkbox"/>            |
| • Were the outcomes or follow up results of cases clearly reported?                                             | <input checked="" type="checkbox"/> | <input type="checkbox"/>            | <input type="checkbox"/>            | <input type="checkbox"/>            |
| • Was there clear reporting of the presenting site(s)/clinic(s) demographic information?                        | <input type="checkbox"/>            | <input checked="" type="checkbox"/> | <input type="checkbox"/>            | <input type="checkbox"/>            |
| • Was statistical analysis appropriate?                                                                         | <input type="checkbox"/>            | <input type="checkbox"/>            | <input type="checkbox"/>            | <input checked="" type="checkbox"/> |

Overall appraisal:      Include       Exclude       Seek further info

Comments (Including reason for exclusion)

# JBI Critical Appraisal Checklist for Case Series

Reviewer: Britt Debaene, Sander Vandeweege and Hans Verstraelen

Date: 16/04/2023

Author: Andreas R. Günthert

Year: 2007

Record Number \_\_\_\_\_

|                                                                                                                 | Yes                                 | No                                  | Unclear                             | Not applicable           |
|-----------------------------------------------------------------------------------------------------------------|-------------------------------------|-------------------------------------|-------------------------------------|--------------------------|
| • Were there clear criteria for inclusion in the case series?                                                   | <input checked="" type="checkbox"/> | <input type="checkbox"/>            | <input type="checkbox"/>            | <input type="checkbox"/> |
| • Was the condition measured in a standard, reliable way for all participants included in the case series?      | <input type="checkbox"/>            | <input type="checkbox"/>            | <input checked="" type="checkbox"/> | <input type="checkbox"/> |
| • Were valid methods used for identification of the condition for all participants included in the case series? | <input type="checkbox"/>            | <input type="checkbox"/>            | <input checked="" type="checkbox"/> | <input type="checkbox"/> |
| • Did the case series have consecutive inclusion of participants?                                               | <input type="checkbox"/>            | <input type="checkbox"/>            | <input checked="" type="checkbox"/> | <input type="checkbox"/> |
| • Did the case series have complete inclusion of participants?                                                  | <input type="checkbox"/>            | <input type="checkbox"/>            | <input checked="" type="checkbox"/> | <input type="checkbox"/> |
| • Was there clear reporting of the demographics of the participants in the study?                               | <input checked="" type="checkbox"/> | <input type="checkbox"/>            | <input type="checkbox"/>            | <input type="checkbox"/> |
| • Was there clear reporting of clinical information of the participants?                                        | <input checked="" type="checkbox"/> | <input type="checkbox"/>            | <input type="checkbox"/>            | <input type="checkbox"/> |
| • Were the outcomes or follow up results of cases clearly reported?                                             | <input checked="" type="checkbox"/> | <input type="checkbox"/>            | <input type="checkbox"/>            | <input type="checkbox"/> |
| • Was there clear reporting of the presenting site(s)/clinic(s) demographic information?                        | <input type="checkbox"/>            | <input checked="" type="checkbox"/> | <input type="checkbox"/>            | <input type="checkbox"/> |
| • Was statistical analysis appropriate?                                                                         | <input type="checkbox"/>            | <input type="checkbox"/>            | <input checked="" type="checkbox"/> | <input type="checkbox"/> |

Overall appraisal:    Include     Exclude     Seek further info

Comments (Including reason for exclusion)

---



---

# JBI Critical Appraisal Checklist for Case Series

Reviewer: Britt Debaene, Sander Vandeweege and Hans Verstraelen

Date: 16/04/2023

Author: D. Trokoudes

Year: 2019

Record Number \_\_\_\_\_

|                                                                                                                 | Yes                                 | No                       | Unclear                             | Not applicable                      |
|-----------------------------------------------------------------------------------------------------------------|-------------------------------------|--------------------------|-------------------------------------|-------------------------------------|
| • Were there clear criteria for inclusion in the case series?                                                   | <input checked="" type="checkbox"/> | <input type="checkbox"/> | <input type="checkbox"/>            | <input type="checkbox"/>            |
| • Was the condition measured in a standard, reliable way for all participants included in the case series?      | <input type="checkbox"/>            | <input type="checkbox"/> | <input checked="" type="checkbox"/> | <input type="checkbox"/>            |
| • Were valid methods used for identification of the condition for all participants included in the case series? | <input type="checkbox"/>            | <input type="checkbox"/> | <input checked="" type="checkbox"/> | <input type="checkbox"/>            |
| • Did the case series have consecutive inclusion of participants?                                               | <input type="checkbox"/>            | <input type="checkbox"/> | <input checked="" type="checkbox"/> | <input type="checkbox"/>            |
| • Did the case series have complete inclusion of participants?                                                  | <input type="checkbox"/>            | <input type="checkbox"/> | <input checked="" type="checkbox"/> | <input type="checkbox"/>            |
| • Was there clear reporting of the demographics of the participants in the study?                               | <input checked="" type="checkbox"/> | <input type="checkbox"/> | <input type="checkbox"/>            | <input type="checkbox"/>            |
| • Was there clear reporting of clinical information of the participants?                                        | <input checked="" type="checkbox"/> | <input type="checkbox"/> | <input type="checkbox"/>            | <input type="checkbox"/>            |
| • Were the outcomes or follow up results of cases clearly reported?                                             | <input checked="" type="checkbox"/> | <input type="checkbox"/> | <input type="checkbox"/>            | <input type="checkbox"/>            |
| • Was there clear reporting of the presenting site(s)/clinic(s) demographic information?                        | <input type="checkbox"/>            | <input type="checkbox"/> | <input checked="" type="checkbox"/> | <input type="checkbox"/>            |
| • Was statistical analysis appropriate?                                                                         | <input type="checkbox"/>            | <input type="checkbox"/> | <input type="checkbox"/>            | <input checked="" type="checkbox"/> |

Overall appraisal:    Include     Exclude     Seek further info

Comments (Including reason for exclusion)

---



---

# JBI CRITICAL APPRAISAL CHECKLIST FOR CASE CONTROL STUDIES

Reviewer: Britt Debaene, Sander Vandeweege and Hans Verstraelen

Date: 16/04/2023

Author: C.A. Higgins

Year: 2012

Record Number \_\_\_\_\_

|                                                                                                                  | Yes                                 | No                                  | Unclear                             | Not applicable                      |
|------------------------------------------------------------------------------------------------------------------|-------------------------------------|-------------------------------------|-------------------------------------|-------------------------------------|
| 1. Were the groups comparable other than the presence of disease in cases or the absence of disease in controls? | <input type="checkbox"/>            | <input checked="" type="checkbox"/> | <input type="checkbox"/>            | <input type="checkbox"/>            |
| 2. Were cases and controls matched appropriately?                                                                | <input type="checkbox"/>            | <input type="checkbox"/>            | <input type="checkbox"/>            | <input type="checkbox"/>            |
| 3. Were the same criteria used for identification of cases and controls?                                         | <input type="checkbox"/>            | <input type="checkbox"/>            | <input checked="" type="checkbox"/> | <input type="checkbox"/>            |
| 4. Was exposure measured in a standard, valid and reliable way?                                                  | <input checked="" type="checkbox"/> | <input type="checkbox"/>            | <input type="checkbox"/>            | <input type="checkbox"/>            |
| 5. Was exposure measured in the same way for cases and controls?                                                 | <input checked="" type="checkbox"/> | <input type="checkbox"/>            | <input type="checkbox"/>            | <input type="checkbox"/>            |
| 6. Were confounding factors identified?                                                                          | <input checked="" type="checkbox"/> | <input type="checkbox"/>            | <input type="checkbox"/>            | <input type="checkbox"/>            |
| 7. Were strategies to deal with confounding factors stated?                                                      | <input checked="" type="checkbox"/> | <input type="checkbox"/>            | <input type="checkbox"/>            | <input type="checkbox"/>            |
| 8. Were outcomes assessed in a standard, valid and reliable way for cases and controls?                          | <input checked="" type="checkbox"/> | <input type="checkbox"/>            | <input type="checkbox"/>            | <input type="checkbox"/>            |
| 9. Was the exposure period of interest long enough to be meaningful?                                             | <input type="checkbox"/>            | <input type="checkbox"/>            | <input type="checkbox"/>            | <input checked="" type="checkbox"/> |
| 10. Was appropriate statistical analysis used?                                                                   | <input checked="" type="checkbox"/> | <input type="checkbox"/>            | <input type="checkbox"/>            | <input type="checkbox"/>            |

Overall appraisal:      Include       Exclude       Seek further info

Comments (Including reason for exclusion)

---



---



---
